# Supplementary material for: Trends in Life Expectancy and Its Association with Economic Factors in the Belt and Road Countries—Evidence from 2000–2014
Source: MDPI journal article supplement (doi:10.3390/ijerph15122890), 2018-12-17
Supplement: s1 [file s1]

## Supplements document

**Table S1.** Normal distribution test of life expectancy by year.

| Year | Sex   | Shapiro-Wilk statistic | <i>p</i> -value |
|------|-------|------------------------|-----------------|
| 2000 | Women | 0.924                  | 0.001           |
|      | Men   | 0.978                  | 0.350           |
| 2001 | Women | 0.932                  | 0.003           |
|      | Men   | 0.973                  | 0.206           |
| 2002 | Women | 0.941                  | 0.007           |
|      | Men   | 0.971                  | 0.173           |
| 2003 | Women | 0.944                  | 0.009           |
|      | Men   | 0.972                  | 0.192           |
| 2004 | Women | 0.951                  | 0.018           |
|      | Men   | 0.970                  | 0.152           |
| 2005 | Women | 0.951                  | 0.018           |
|      | Men   | 0.964                  | 0.082           |
| 2006 | Women | 0.958                  | 0.038           |
|      | Men   | 0.967                  | 0.106           |
| 2007 | Women | 0.960                  | 0.051           |
|      | Men   | 0.967                  | 0.113           |
| 2008 | Women | 0.963                  | 0.073           |
|      | Men   | 0.983                  | 0.570           |
| 2009 | Women | 0.967                  | 0.108           |
|      | Men   | 0.966                  | 0.100           |
| 2010 | Women | 0.969                  | 0.135           |
|      | Men   | 0.964                  | 0.074           |
| 2011 | Women | 0.968                  | 0.127           |
|      | Men   | 0.968                  | 0.128           |
| 2012 | Women | 0.967                  | 0.108           |
|      | Men   | 0.974                  | 0.235           |
| 2013 | Women | 0.968                  | 0.116           |
|      | Men   | 0.977                  | 0.327           |
| 2014 | Women | 0.970                  | 0.159           |
|      | Men   | 0.974                  | 0.242           |

Normal distribution test for belt and road country's life expectancy. From 2000 to 2006, through Shapiro-Wilk test, women's life expectancy was not normal.

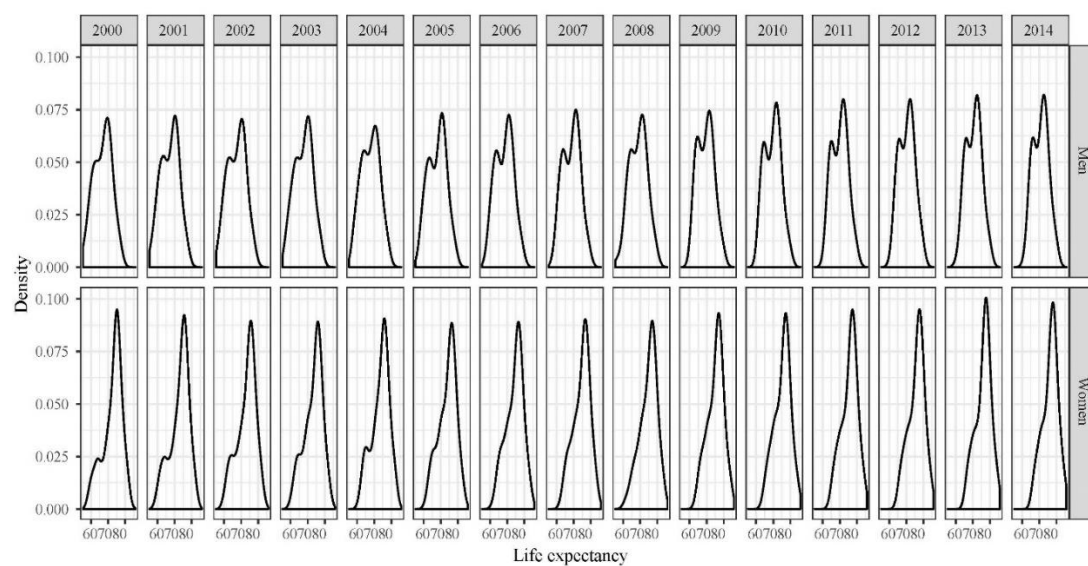

**Figure S1.** Probability density of life expectancy in B&R countries.
